# Supplementary material
Source: publisher figshare collection journal article supplement (https://tandf.figshare.com/ndownloader/files/14011808)
Supplement: Supplementary file 1 [file 14011808]

Study	Glass.ID	Al2O3	B2O3	CaO	Fe2O3	Li2O	Na2O	SiO2	Others	Sum
NP1	Neph-NN-1-12	0.2692	0.17	0.0047	0.0236	0.0567	0.15	0.2899	0.0359	1
NP2	BL3	0.285	0.172	0.0065	0.025	0.05	0.125	0.2935	0.043	1
NP2	NP2-High Al	0.314968503149685	0.164783521647835	0.0061993800619938	0.023997600239976	0.0478952104789521	0.11978802119788	0.281171882811719	0.0411958804119588	1
NP2	NP2-High B	0.268446310737852	0.21995600879824	0.00609878024395121	0.0235952809438112	0.0470905818836233	0.117776444711058	0.276444711057788	0.0405918816236753	1
NP2	NP2-High Li	0.282	0.1702	0.0064	0.0247	0.06	0.1237	0.2904	0.0426	1
NP2	NP2-High Na*	0.274572542745725	0.165683431656834	0.0062993700629937	0.0240975902409759	0.0481951804819518	0.154584541545845	0.282771722827717	0.0437956204379562	1
NP2	NP2-High Si	0.2703	0.1631	0.0062	0.0237	0.0474	0.1185	0.33	0.0408	1
NP2	NP2-Low Al	0.255025502550255	0.179217921792179	0.0068006800680068	0.026002600260026	0.0521052105210521	0.13021302130213	0.305830583058306	0.0448044804480448	1
NP2	NP2-Low B	0.296	0.14	0.0068	0.026	0.0519	0.1298	0.3048	0.0447	1
NP2	NP2-Low Li	0.288	0.1738	0.0066	0.0253	0.04	0.1263	0.2966	0.0434	1
NP2	NP2-Low Na	0.2948	0.1779	0.0067	0.0259	0.0517	0.095	0.3036	0.0444	1
NP2	NP2-Low Si	0.298529852985298	0.18021802180218	0.0068006800680068	0.0262026202620262	0.0524052405240524	0.130913091309131	0.26002600260026	0.0449044904490449	1
NP2	NP2-Very High Al	0.344931013797241	0.157568486302739	0.00599880023995201	0.0228954209158168	0.0457908418316337	0.114477104579084	0.268846230753849	0.0394921015796841	1
NP2	NP2-Very High Si	0.254125412541254	0.153415341534153	0.0058005800580058	0.0223022302230223	0.0446044604460446	0.111511151115112	0.37003700370037	0.0382038203820382	1
NP2	NP2-Very Low Si	0.3146	0.1899	0.0072	0.0276	0.0552	0.138	0.22	0.0475	1
NP3	NP-MC-AlB-1	0.254974502549745	0.21997800219978	0.0062993700629937	0.0241975802419758	0.0482951704829517	0.120887911208879	0.283771622837716	0.0415958404159584	1
NP3	NP-MC-AlBNa-1	0.268026802680268	0.153915391539154	0.0073007300730073	0.0281028102810281	0.0562056205620562	0.108010801080108	0.33003300330033	0.0484048404840484	1
NP3	NP-MC-AlBNa-2	0.298270172982702	0.193180681931807	0.0057994200579942	0.0220977902209779	0.0442955704429557	0.138286171382862	0.25997400259974	0.0380961903809619	1
NP3	NP-MC-AlBSi-1	0.315	0.22	0.0053	0.0205	0.0411	0.1027	0.26	0.0354	1
NP3	NP-MC-AlLi-1	0.254974502549745	0.182281771822818	0.0068993100689931	0.0264973502649735	0.03999600039996	0.132486751324868	0.311168883111689	0.0456954304569543	1
NP3	NP-MC-AlLi-2	0.315031503150315	0.166816681668167	0.0063006300630063	0.0242024202420242	0.04000400040004	0.121212121212121	0.284728472847285	0.0417041704170417	1
NP3	NP-MC-AlLiNa-1	0.3114	0.1524	0.0058	0.0221	0.0588	0.1514	0.26	0.0381	1
NP3	NP-MC-AlLiSi-1	0.255	0.206	0.0078	0.0299	0.04	0.1497	0.26	0.0516	1
NP3	NP-MC-AlNa-1	0.255	0.172	0.0065	0.025	0.05	0.155	0.2935	0.043	1
NP3	NP-MC-AlSi-1	0.25494901019796	0.197860427914417	0.00749850029994001	0.0287942411517696	0.0574885022995401	0.14377124575085	0.25994801039792	0.0496900619876025	1
NP3	NP-MC-AlSi-2	0.314968503149685	0.144885511448855	0.0054994500549945	0.0210978902109789	0.0420957904209579	0.105289471052895	0.32996700329967	0.0361963803619638	1
NP3	NP-MC-BLiSi-1	0.276472352764724	0.13998600139986	0.0062993700629937	0.0242975702429757	0.05999400059994	0.121287871212879	0.32996700329967	0.0416958304169583	1
NP3	NP-MC-BLiSi-2	0.2706	0.22	0.0062	0.0237	0.06	0.1187	0.26	0.0408	1
NP3	NP-MC-BNa-1	0.285857171434287	0.14002800560112	0.00650130026005201	0.0251050210042008	0.0501100220044009	0.15503100620124	0.294358871774355	0.0430086017203441	1
NP3	NP-MC-BNaSi-1	0.30966903309669	0.13998600139986	0.0070992900709929	0.0271972802719728	0.0542945705429457	0.154984501549845	0.25997400259974	0.0467953204679532	1
NP3	NP-MC-BSi-1	0.255025502550255	0.204020402040204	0.0058005800580058	0.0224022402240224	0.0447044704470447	0.111811181118112	0.317831783178318	0.0384038403840384	1
NP5	NP5-01	0.2231	0.2112	0.05	0.0506	0	0.1333	0.2614	0.0704	1
NP5	NP5-04	0.202	0.1933	0.0169	0.0387	0.0385	0.1112	0.3145	0.0849	1
NP5	NP5-05	0.283	0.1503	0.044	0.035	0.0491	0.0808	0.2594	0.0984	1
NP5	NP5-06	0.235	0.2199	0.007	0.0412	0.0457	0.0829	0.2985	0.0698	1
NP5	NP5-07	0.2797	0.2166	0.0235	0.0284	0.0082	0.145	0.2305	0.0681	1
NP5	NP5-08	0.2971	0.1868	0.0044	0.0441	0.0533	0.1158	0.2317	0.0668	1
NP5	NP5-09	0.2539	0.1821	0.0229	0.0311	0.0423	0.1208	0.2547	0.0922	1
NP5	NP5-10	0.2457	0.1282	0.0571	0.0564	0.0403	0.1155	0.27	0.0868	1
NP5	NP5-11	0.205	0.1374	0.0401	0.0208	0.0479	0.1328	0.3265	0.0895	1
NP5	NP5-12	0.2022	0.1514	0.0677	0.0583	0.0272	0.0922	0.286	0.115	1
NP5	NP5-13	0.2107	0.1468	0.0647	0.0444	0.0103	0.1358	0.2382	0.1491	1
NP5	NP5-14	0.217	0.1762	7e-04	0.0487	0.0322	0.143	0.2766	0.1056	1
NP5	NP5-15	0.2089	0.1608	0.0083	0.0551	0.0585	0.0998	0.32	0.0886	1
NP5	NP5-16	0.2747	0.1349	0.0342	0.0531	0.0348	0.1468	0.2364	0.0851	1
NP5	NP5-17	0.2583	0.2227	0.0574	0.0234	0.0135	0.0813	0.2356	0.1078	1
NP5	NP5-18	0.2135	0.2002	0.0593	0.0256	0.016	0.1226	0.3118	0.051	1
NP5	NP5-19	0.2243	0.1381	0.0248	0.0377	0.0292	0.1349	0.2899	0.1211	1
NP5	NP5-20	0.2061	0.1649	0.0322	0.0404	0.0335	0.1033	0.2691	0.1505	1
NP5	NP5-21	0.2588	0.1353	0.0205	0.0261	0.0591	0.0933	0.2433	0.1636	1
NP5	NP5-22	0.2291	0.185	0.0516	0.0191	0.012	0.1085	0.2455	0.1492	1
NP5	NP5-23	0.2866	0.173	0.0658	0.0196	0.0289	0.1145	0.2269	0.0847	1
NP5	NP5-24	0.2442	0.1741	0.0308	0.0183	0.0205	0.1499	0.3022	0.06	1
NP5	NP5-25	0.2895	0.1287	0.0146	0.0176	0.0563	0.1302	0.2645	0.0986	1
NP5	NP5-26	0.2079	0.2081	0.0134	0.0218	0.0051	0.144	0.263	0.1367	1
NP5	NP5-27	0.267	0.1657	0.0473	0.0225	0.0528	0.1008	0.2816	0.0623	1
NP5	NP5-BL3	0.285	0.172	0.0065	0.025	0.05	0.125	0.2935	0.043	1
